# Supplementary material for: Insurance Policy Conditions andthe Nebraska Contribute to theLoss Statute: A Primer and APartial Critique
Source: Royal Society of Chemistry journal article supplement (doi:10.1039/d1dt00198a), 1982-01-01
Supplement: d1dt00198a1.pdf [file d1dt00198a1.pdf]

## Supporting Information For

# **A pyridyl-decorated Zr-organic framework for enhanced gas separation and CO<sub>2</sub> transformation**

*Yong-Liang Liu<sup>a</sup>, Yanqing Di<sup>a</sup>, Fengying Chen<sup>a</sup>, Chunsheng Zhou<sup>a\*</sup> and Bo Liu<sup>b\*</sup>*

<sup>a</sup>College of Chemical Engineering and Modern Materials, Shaanxi Key Laboratory of Comprehensive Utilization of Tailings Resources, Shaanxi Engineering Research Center for Mineral Resources Clean & Efficient Conversion and New Materials, Shang Luo University, Shang Luo, 726000, P. R. China

<sup>b</sup>College of Chemistry & Pharmacy, Northwest A&F University, Yangling, 712100, P. R. China

\*E-mail: chemliubo@nwsuaf.edu.cn; slzhoucs@126.com.

## **Experimental section**

Py-UiO-66 was prepared by adding ZrCl<sub>4</sub> (47 mg), 3-(2',5'-dicarboxylphenyl)pyridine acid (49 mg), and acetic acid (1.8 mL) successively into 5 mL of N,N-dimethylformamide (DMF) in a 10 mL screw-capped glass vial. The mixture was sonicated sufficiently and capped tightly. The glass vial was heated at 120 °C for 48 h and then slowly cooled to room temperature. The resulting white power were filtered, washed with a small amount of DMF and methanol and air-dried with ~67% yield.

## **Sorption Measurements.**

All the gas sorption isotherms were measured by using a ASAP 2020M adsorption equipment. The activated samples were prepared by soaking the as-synthesized samples

in methanol for 3 days and subsequently drying the material overnight at 140 °C under vacuum to remove the solvent molecules prior to measurements.

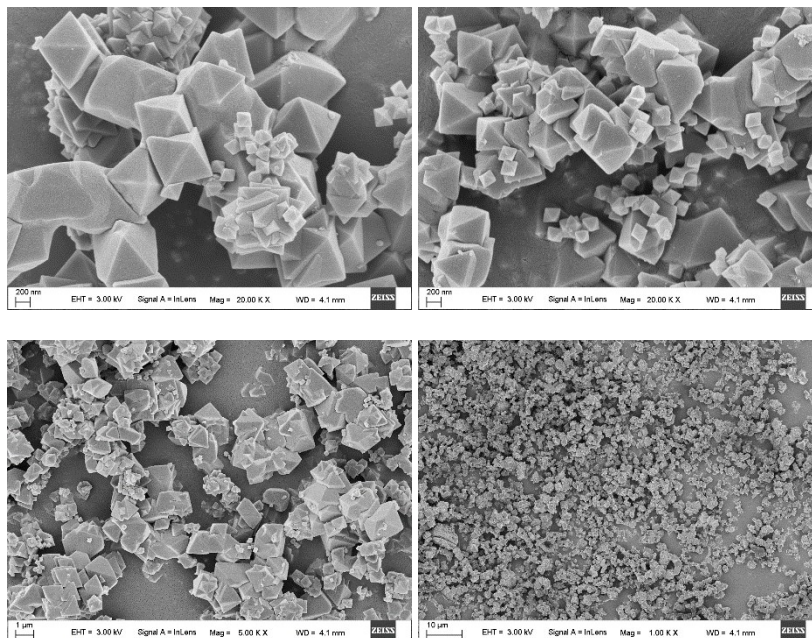

**Figure S1.** The SEM images of as-synthesized Py-UiO-66.

### IAST adsorption selectivity calculation:

The experimental isotherm data for pure C<sub>2</sub>H<sub>2</sub>, CO<sub>2</sub>, and CH<sub>4</sub> (measured at 298) were fitted using a dual Langmuir-Freundlich (L-F) model:

$$q = \frac{a_1 * b_1 * P^{1/c_1}}{1 + b_1 * P^{1/c_1}} + \frac{a_2 * b_2 * P^{1/c_2}}{1 + b_1 * P^{1/c_1}}$$

Where  $q$  and  $p$  are adsorbed amounts and pressures of component  $i$ , respectively.

The adsorption selectivities for binary mixtures of C<sub>2</sub>H<sub>2</sub>/CH<sub>4</sub> and CO<sub>2</sub>/CH<sub>4</sub>, defined by

$$S_{i/j} = \frac{x_i * y_j}{x_j * y_i}$$

were calculated using the Ideal Adsorption Solution Theory (IAST) of Myers and Prausnitz.

Where  $x_i$  is the mole fraction of component  $i$  in the adsorbed phase and  $y_i$  is the mole fraction of component  $i$  in the bulk.

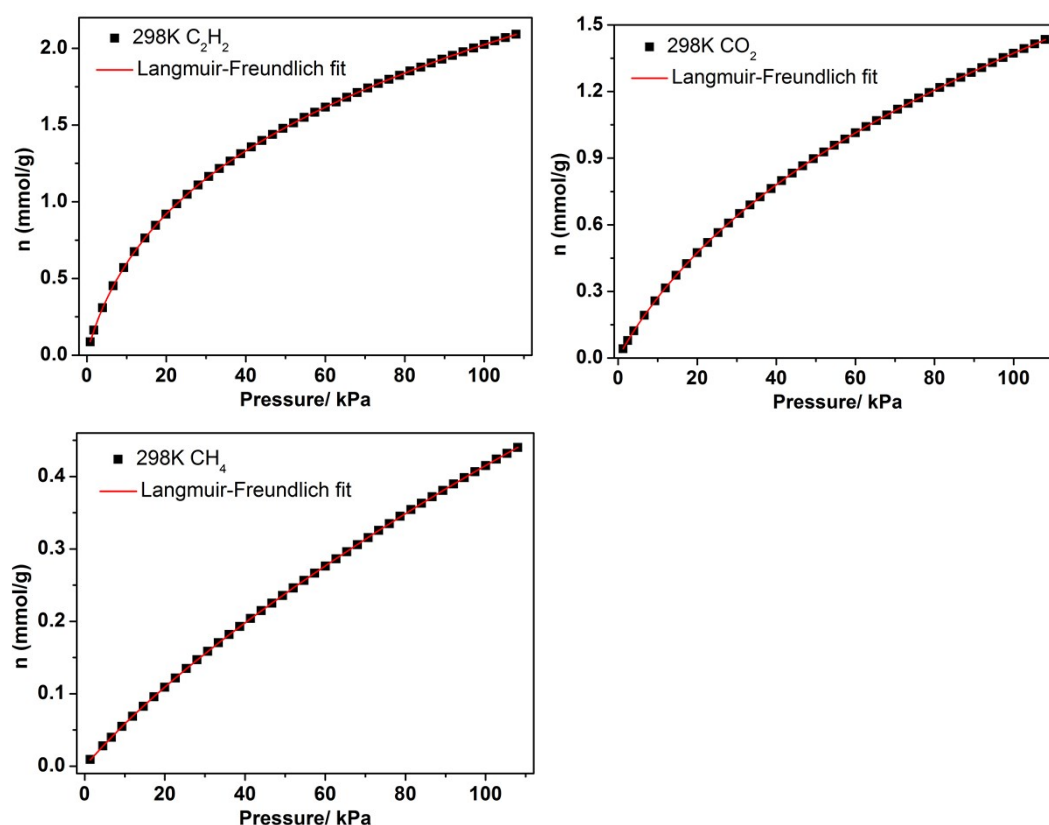

**Figure S2.**  $\text{C}_2\text{H}_2$  adsorption isotherms of Py-UiO-66 with fitting by L-F model:  $a_1 = 2.04275$ ,  $b_1 = 6.8237 \times 10^{-4}$ ,  $c_1 = 1.34667$ ,  $a_2 = 2.02034$ ,  $b_2 = 0.05177$ ,  $c_2 = 0.87805$ ,  $\chi^2 = 1.33524 \times 10^{-6}$ ,  $R^2 = 1$ ;  $\text{CO}_2$  adsorption isotherms of Py-UiO-66 with fitting by L-F model:  $a_1 = 1.37277$ ,  $b_1 = 0.0209$ ,  $c_1 = 0.9475$ ,  $a_2 = 7.31808$ ,  $b_2 = 8.27011 \times 10^{-4}$ ,  $c_2 = 0.98282$ ,  $\chi^2 = 2.71916 \times 10^{-7}$ ,  $R^2 = 1$ ;  $\text{CH}_4$  adsorption isotherms of Py-UiO-66 with fitting by L-F model:  $a_1 = 0.30952$ ,  $b_1 = 0.01955$ ,  $c_1 = 1.00146$ ,  $a_2 = 0.90831$ ,  $b_2 = 0.00024$ ,  $c_2 = 1.54606$ ,  $\chi^2 = 1.7122 \times 10^{-7}$ ,  $R^2 = 0.99999$ .

### Calculation of sorption heat for C<sub>2</sub>H<sub>2</sub>, CO<sub>2</sub> and CH<sub>4</sub> uptakes using Virial 2 model

$$\ln P = \ln N + 1/T \sum_{i=0}^m aiN^i + \sum_{i=0}^n biN^i \quad Q_{st} = -R \sum_{i=0}^m aiN^i$$

The above equation was applied to fit the combined C<sub>2</sub>H<sub>2</sub>, CO<sub>2</sub> and CH<sub>4</sub> and isotherm data for Py-UiO-66 at 273 and 298 K, where  $P$  is the pressure,  $N$  is the adsorbed amount,  $T$  is the temperature,  $ai$  and  $bi$  are virial coefficients, and  $m$  and  $n$  are the number of coefficients used to describe the isotherms.  $Q_{st}$  is the coverage-dependent enthalpy of adsorption and  $R$  is the universal gas constant.

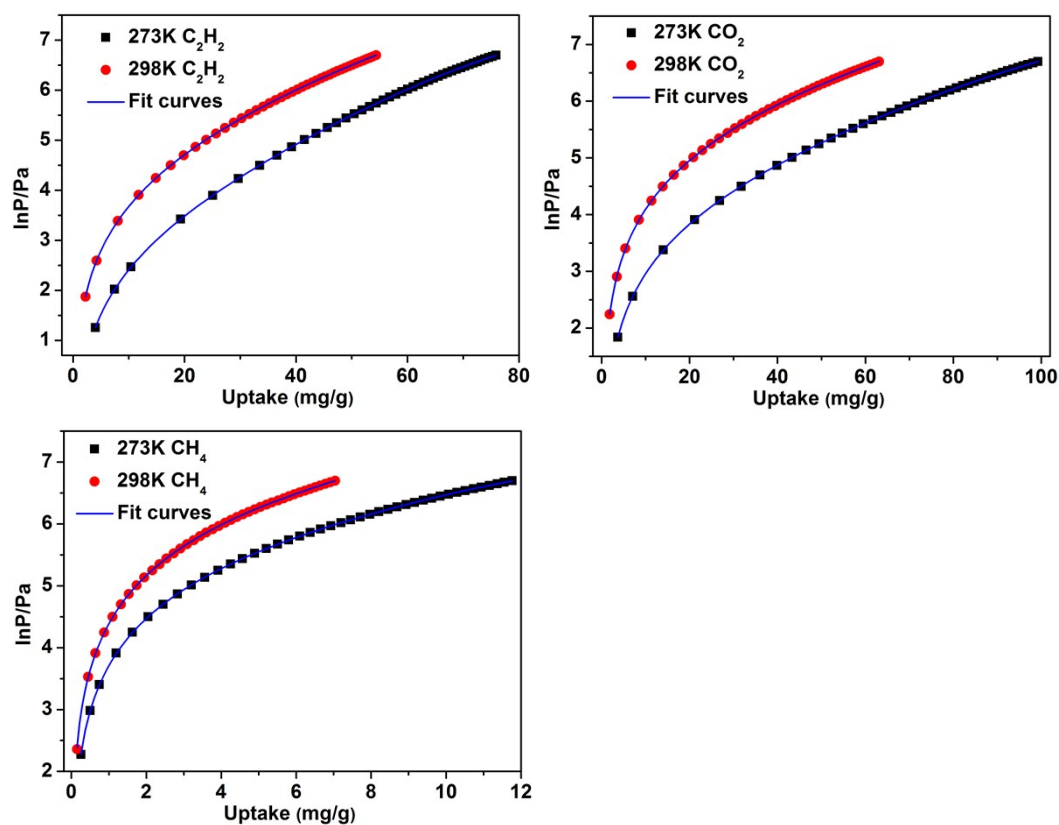

**Figure S3.** C<sub>2</sub>H<sub>2</sub> adsorption isotherms for Py-UiO-66 with fitting by Virial 2 model. Fitting results:  $a_0 = -4141.31876$ ,  $a_1 = -3.71155$ ,  $a_2 = 0.63667$ ,  $a_3 = -0.00377$ ,  $a_4 = -9.409 \times 10^{-6}$ ,  $b_0 = 14.87678$ ,  $b_1 = 0.05536$ ,  $b_2 = -0.00254$ ,  $b_3 = 1.79743 \times 10^{-5}$ ,  $\chi^2 = 8.22299 \times 10^{-6}$ ,  $R^2 = 0.99999$ ; CO<sub>2</sub> adsorption isotherms for Py-UiO-66 with fitting by Virial 2 model. Fitting results:  $a_0 = -3697.89527$ ,  $a_1 = -2.50709$ ,  $a_2 = 0.28829$ ,  $a_3 = -0.00193$ ,  $a_4 = -1.25008 \times 10^{-6}$ ,  $b_0 = 14.01509$ ,  $b_1 = 0.02854$ ,  $b_2 = -0.00112$ ,  $b_3 = 7.83869 \times 10^{-6}$ ,  $\chi^2 = 7.29667 \times 10^{-6}$ ,  $R^2 = 0.99999$ .
